# Supplementary material for: Toll-like Interleukin 1 Receptor Regulator Is an Important Modulator of Inflammation Responsive Genes
Source: PubMed Central journal article supplement (PMC6403165; doi:10.3389/fimmu.2019.00272), 2019-02-28
Supplement: Data_Sheet_1.pdf [file Data_Sheet_1.pdf]

# **Toll-like Interleukin 1 Receptor Regulator is an important modulator of inflammation responsive genes**

Mohammad Abul Kashem<sup>1,3</sup>, Hongzhao Li<sup>1,3</sup>, Nikki Pauline Toledo<sup>1,3</sup>, Robert Were Omenge<sup>1,3</sup>, Binhua Liang<sup>2,3</sup>, Lewis Ruxi Liu<sup>1,3</sup>, Lin Li<sup>1,3</sup>, Xuefen Yang<sup>3</sup>, Xin-Yong Yuan<sup>4</sup>, Jason Kindrachuk<sup>1</sup>, Francis A Plummer<sup>1</sup>, Ma Luo<sup>1,3,4\*</sup>

<sup>1</sup>Department of Medical Microbiology and Infectious Diseases, University of Manitoba, Winnipeg, MB, Canada

<sup>2</sup>Department of Biochemistry & Medical Genetics, University of Manitoba, Winnipeg, MB, Canada

<sup>3</sup>JC Wilt Infectious Diseases Research Centre, National Microbiology Laboratory, Winnipeg, MB, Canada

<sup>4</sup>National Microbiology Laboratory, Public Health Agency of Canada, Winnipeg, MB, Canada.

\* Address correspondence to: Ma Luo, PhD

JC Wilt Infectious Diseases Research Center, National Microbiology Laboratory, Winnipeg, MB, Canada; and  
Department of Medical Microbiology, University of Manitoba, Winnipeg, MB, Canada  
Phone: 204-789-5072, Fax: 204-789-2018  
Email: ma.luo@canada.ca, Ma.Luo@umanitoba.ca

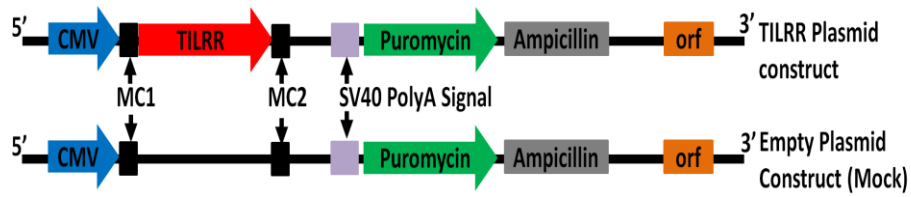

**Figure S1. Diagram of plasmid constructs.** TILRR (2148bp) inserted pEZ-M68 vector containing CMV promoter, puromycin and ampicillin marker, and orf backbone (top), empty control pEZ-M68 vector containing CMV promoter, puromycin and ampicillin marker, and orf (bottom).

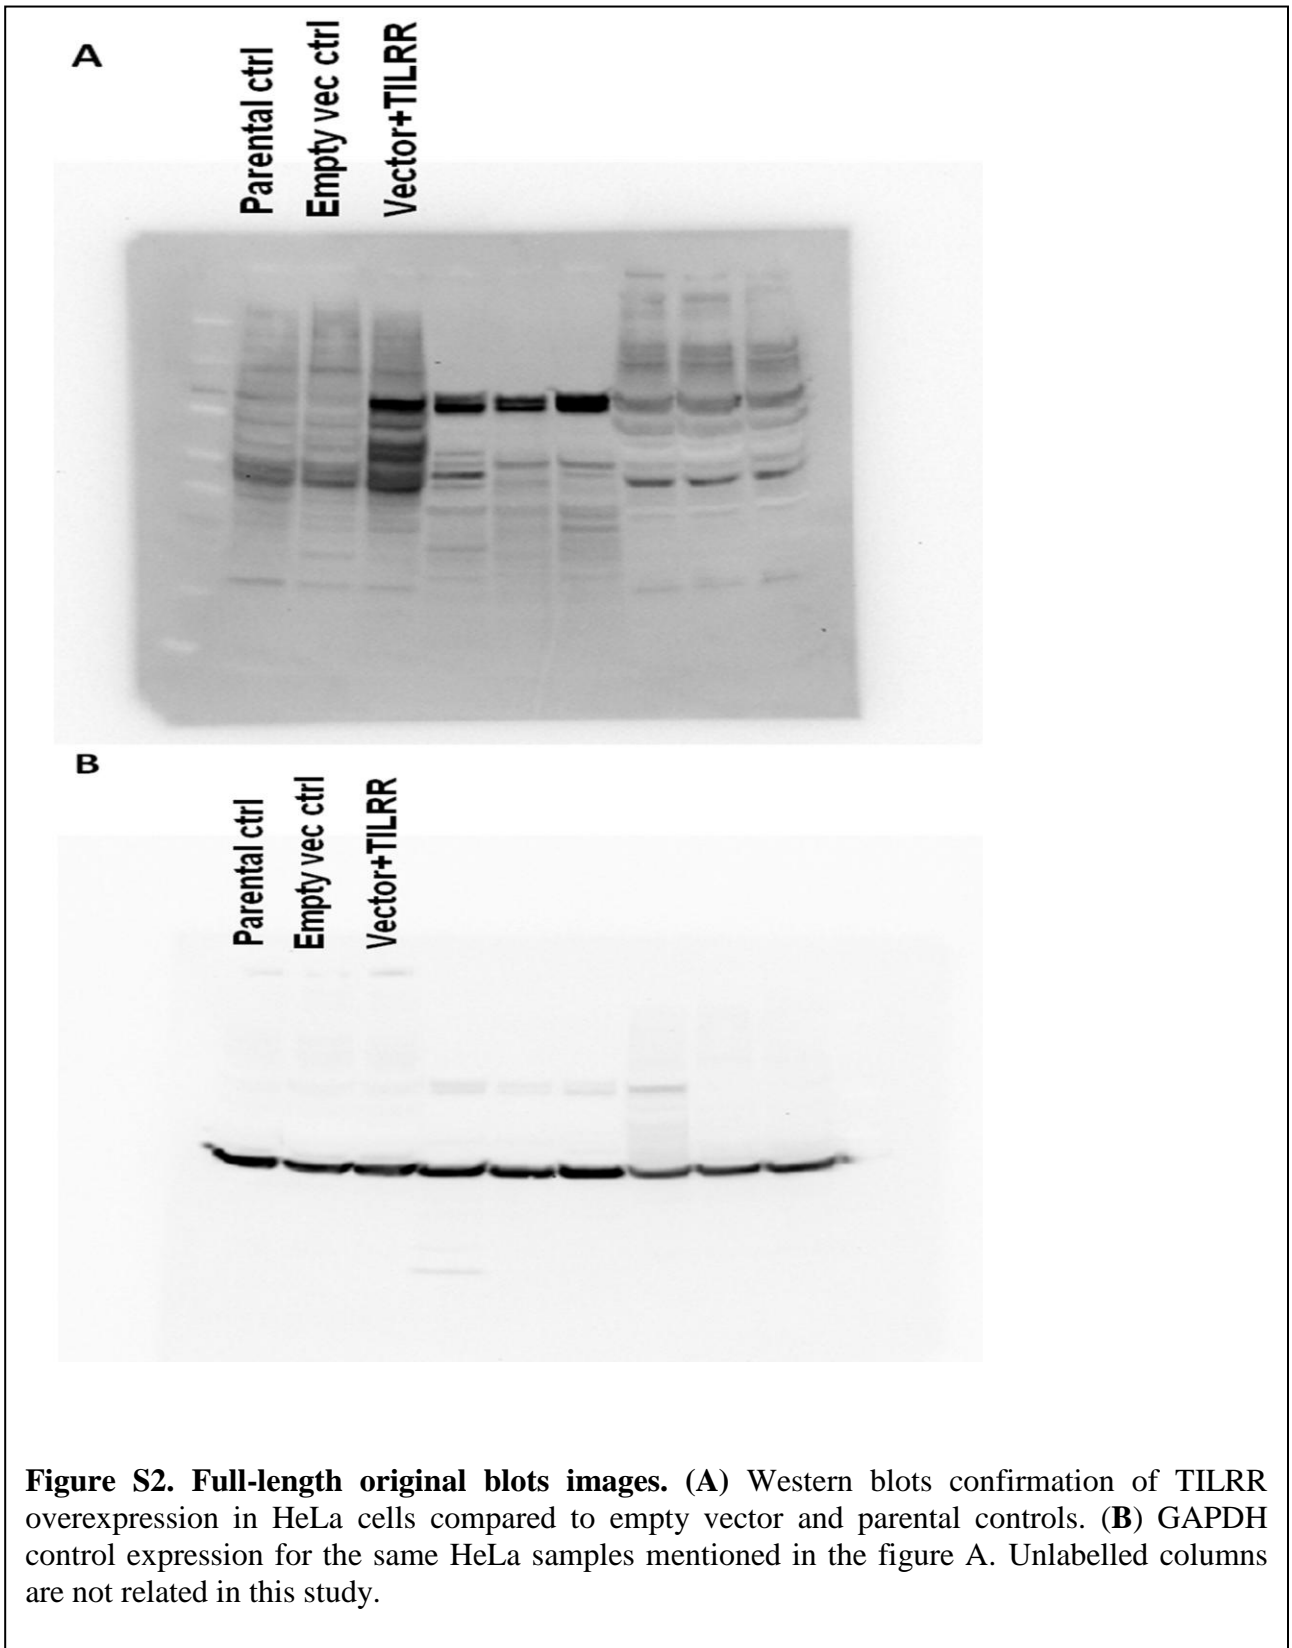

**Figure S2. Full-length original blots images.** (A) Western blots confirmation of TILRR overexpression in HeLa cells compared to empty vector and parental controls. (B) GAPDH control expression for the same HeLa samples mentioned in the figure A. Unlabelled columns are not related in this study.

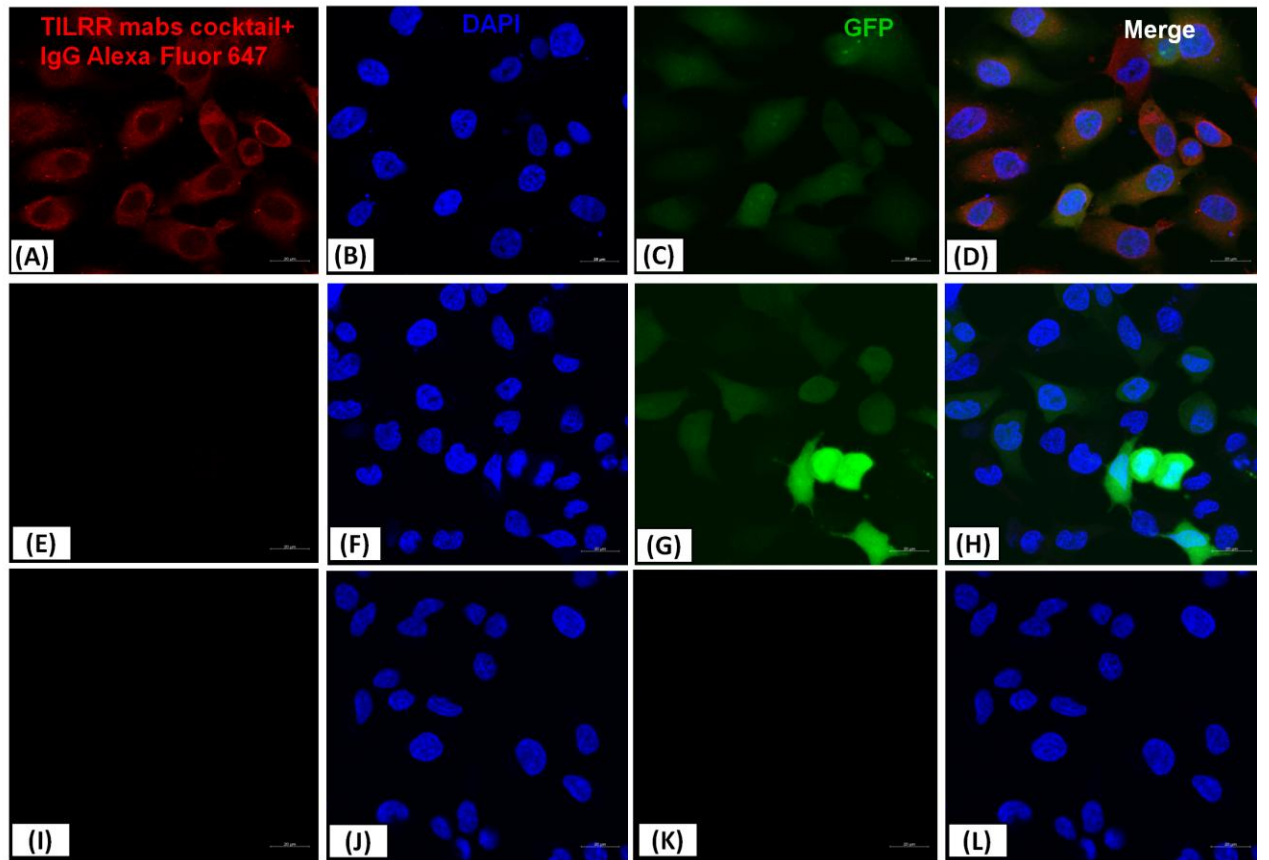

**Figure S3. Overexpressed TILRR protein in transfected cells under confocal microscopy.** HeLa cells were prepared and stained for confocal imaging as described in materials and method section. **(A-D)** TILRR protein expression in TILRR overexpressed cells, **(E-H)** Empty vector-transfected control cells **(I-L)** Parental non-transfected cells. Color code: red, TILRR protein (Alexa Fluor 647 channel); blue, nuclear DNA (DAPI channel); and green, eGFP (FITC channel). Image captured using 20x objectives with 20 $\mu$ m scale.

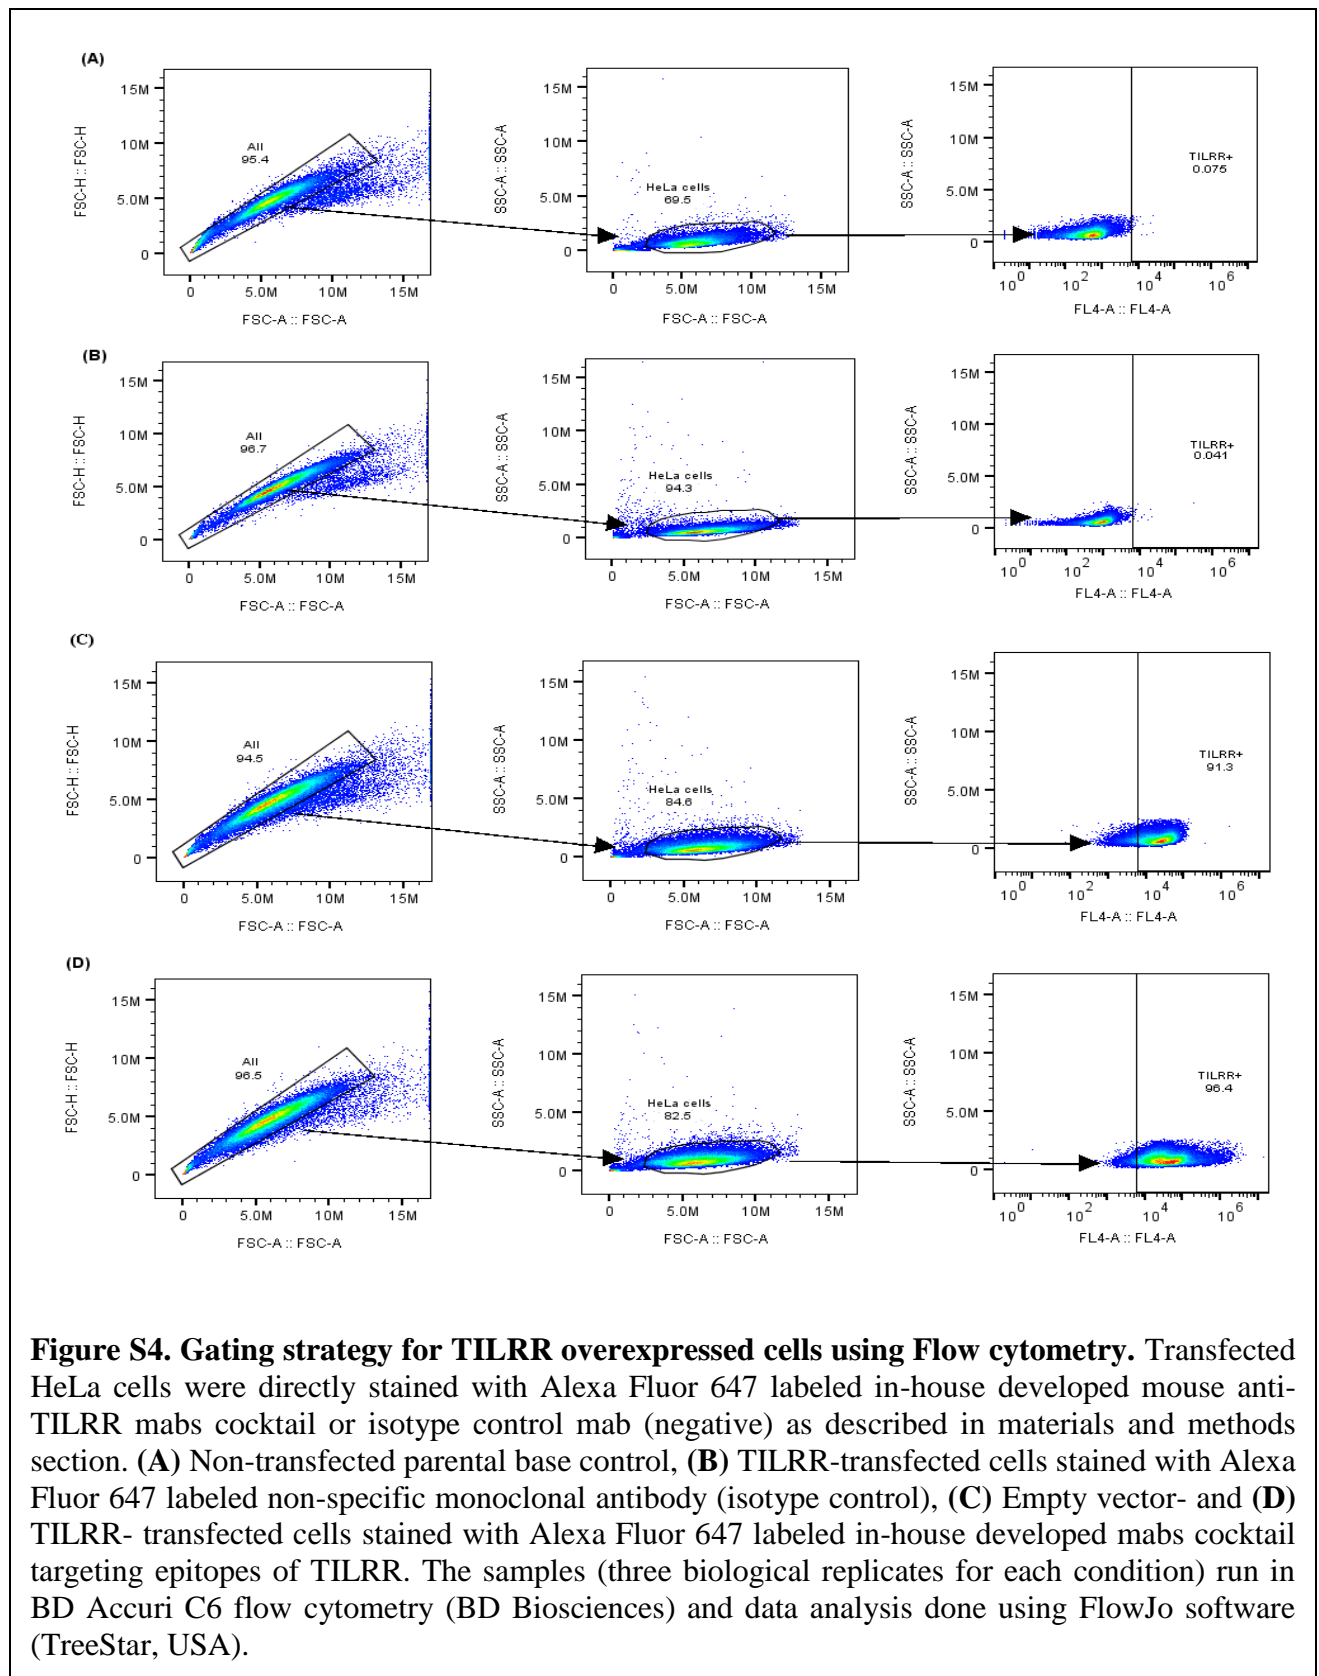

**Figure S4. Gating strategy for TILRR overexpressed cells using Flow cytometry.** Transfected HeLa cells were directly stained with Alexa Fluor 647 labeled in-house developed mouse anti-TILRR mabs cocktail or isotype control mab (negative) as described in materials and methods section. **(A)** Non-transfected parental base control, **(B)** TILRR-transfected cells stained with Alexa Fluor 647 labeled non-specific monoclonal antibody (isotype control), **(C)** Empty vector- and **(D)** TILRR- transfected cells stained with Alexa Fluor 647 labeled in-house developed mabs cocktail targeting epitopes of TILRR. The samples (three biological replicates for each condition) run in BD Accuri C6 flow cytometry (BD Biosciences) and data analysis done using FlowJo software (TreeStar, USA).

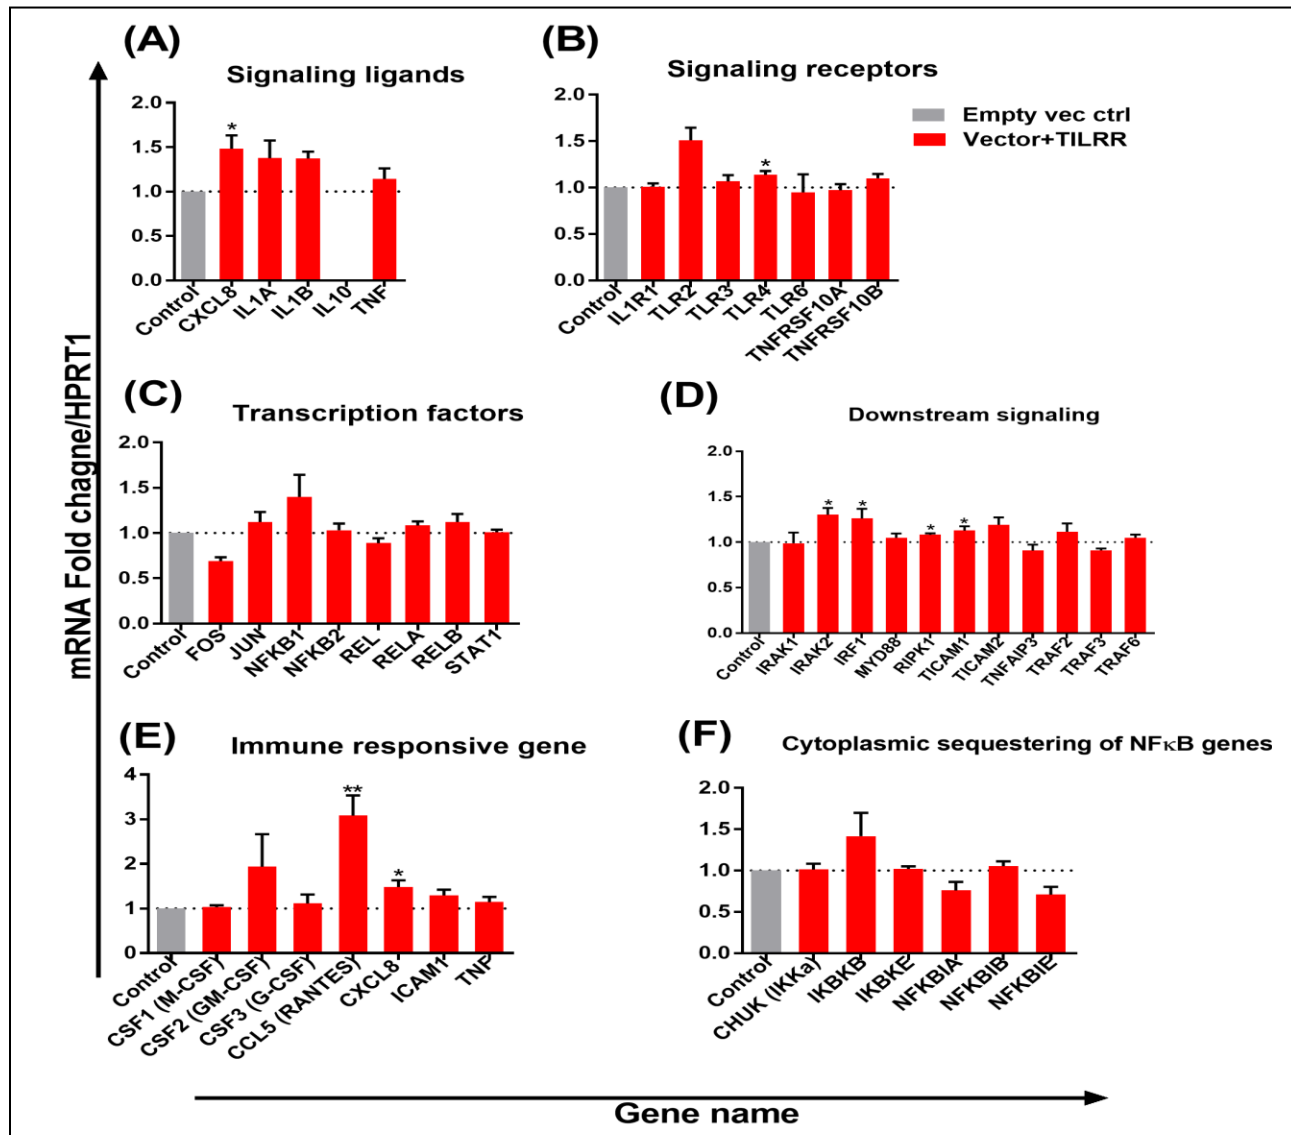

**Figure S5. The mRNA transcripts fold change of NFκB signal transduction pathway after three hours incubation following transfection.** HeLa cells were transiently co-transfected with either pEZ-TILRR-M68 (Vector+TILRR) ( $1.0\mu\text{g}/5\times 10^5$  cells) or pEZ-NEG-M68 (empty vector control) ( $1.0\mu\text{g}/5\times 10^5$  cells) along with PmaxGFP ( $0.2\mu\text{g}/5\times 10^5$  cells) in parallel experiments for 24h at  $37^\circ\text{C}$  with 5%  $\text{CO}_2$  as described in material and methods section. The cells were incubated in serum free DMEM for 3h. Harvested RNAs from both cells used for synthesis of cDNAs that finally run with RT<sup>2</sup> profiler qPCR array targeting NFκB signaling components such as signaling ligands (A), signaling receptors (B), transcription factors (C), downstream signaling genes (D), immune responsive genes (E), and cytoplasmic sequestering of NFκB genes (F). Data were analyzed using GeneGlobe Data Analysis Centre (Qiagen) for RT<sup>2</sup> profiler PCR array. Fold induction for individual gene in TILRR transfected cells expressed as relative to levels of empty vector transfected control and show mean±SEM of three independent experiments. All data were normalized against HPRT1 housekeeping gene. The statistical comparisons conducted using student t test, all  $p<0.05$  were reported and indicated using an asterisks' \* $p<0.05$ , and \*\* $p<0.01$ . Legends on the upper right corner represent the experimental conditions.

**Table S1. Dose response effect of TILRR on immune responsive genes in HeLa cells**

| Gene name    | 0.25 µg DNA                   |         | 0.5 µg DNA    |         | 1.0 µg DNA    |         | 2.0 µg DNA    |         |
|--------------|-------------------------------|---------|---------------|---------|---------------|---------|---------------|---------|
|              | Fold Increase (FI) (mean±SEM) | p-value | FI (mean±SEM) | p-value | FI (mean±SEM) | p-value | FI (mean±SEM) | p-value |
| CCL5(RANTES) | 3.66±0.72                     | 0.0013  | 3.66±0.58     | 0.0006  | 7.76±0.90     | 0.0031  | 6.26±1.20     | 0.0009  |
| CXCL8 (IL-8) | 2.16±0.61                     | 0.0122  | 10.39±2.00    | 0.0012  | 11.28±2.69    | 0.0121  | 6.98±1.71     | 0.0001  |
| IL-6         | 1.52±0.16                     | 0.0091  | 5.35±0.14     | 0.0017  | 5.52±1.30     | 0.0005  | 4.75±0.64     | 0.0003  |
| TNF $\alpha$ | 2.08±1.12                     | 0.1651  | 3.21±0.24     | 0.0010  | 5.63±3.69     | 0.0100  | 3.63±2.50     | 0.0171  |

**Table S2. Dose response effect of TILRR on immune responsive genes in VK2/E6E7 cells**

| Gene name    | 0.25 µg DNA   |         | 0.5 µg DNA    |         | 1.0 µg DNA    |         | 2.0 µg DNA    |         |
|--------------|---------------|---------|---------------|---------|---------------|---------|---------------|---------|
|              | FI (mean±SEM) | p-value | FI (mean±SEM) | p-value | FI (mean±SEM) | p-value | FI (mean±SEM) | p-value |
| CCL5(RANTES) | 1.05±0.05     | 0.1857  | 1.18±0.22     | 0.1536  | 1.07±0.30     | 0.6925  | 1.01±0.17     | 0.9736  |
| CXCL8 (IL-8) | 0.93±0.13     | 0.6583  | 1.86±0.05     | 0.0020  | 1.88±0.90     | 0.0286  | 1.27±0.10     | 0.0066  |
| IL-6         | 1.03±0.11     | 0.4043  | 1.59±0.31     | 0.0238  | 2.47±0.40     | 0.0031  | 0.98±0.23     | 0.8544  |
| TNF $\alpha$ | 0.89±0.16     | 0.2945  | 1.42±0.37     | 0.0775  | 2.40±1.39     | 0.0919  | 1.32±0.55     | 0.2911  |

**Table S3. Gene categories (PAHS-025Z, Qiagen)**

| <b>Category</b>                              | <b>Gene</b>                                                                                                                                                                                                                |
|----------------------------------------------|----------------------------------------------------------------------------------------------------------------------------------------------------------------------------------------------------------------------------|
| NFκB Signaling Ligands                       | CXCL8(IL-8), IL-1A, IL-1B, IL-10, TNF                                                                                                                                                                                      |
| NFκB Signaling receptors                     | CD27 (TNFRSF7), CD40 (TNFRSF5), EGFR (ERBB1), F2R (PAR1), FASLG (TNFSF6), IL-1R1, LTBR, NOD1 (CARD4), TLR1, TLR2, TLR3, TLR4, TLR6, TLR9, TNFRSF1A (TNFR1), TNFRSF10A (TRAIL-R), TNFRSF10B (DR5), TNFSF10 (TRAIL), TNFSF14 |
| NFκB Transcription Factors                   | ATF1, EGR1, ELK1, FOS, JUN, STAT1, NFKB1 (p105/p50), NFKB2 (p100/p52), REL (p65), RELA, RELB                                                                                                                               |
| Signaling Downstream of NFκB                 | BIRC2 (cIAP1), FADD, IRAK1, IRAK2, IRF1, MYD88, RIPK1, TBK1, TICAM1 (TRIF), TICAM2 (TRAM), TNFAIP3, TRADD, TRAF2, TRAF3, TRAF6                                                                                             |
| Immune Responsive genes                      | CCL2 (MCP-1), CCL5 (RANTES), CSF1 (M-CSF), CSF2 (GM-CSF), CSF3 (G-CSF), CXCL8 (IL-8), ICAM1, IFNA1, IFNG, LTA (TNFB), TNF                                                                                                  |
| Cytoplasmic Sequestering / Releasing of NFκB | BCL3, CHUK (IKKα), IKBKB (IKKβ), IKBKE (IKKε), IKBKG, NFKBIA (IκBα), NFKBIB (IκBβ), NFKBIE                                                                                                                                 |
| Apoptosis                                    | AGT, BCL2A1 (BFL1), BCL2L1 (BCLXL), BIRC3 (c-IAP2)                                                                                                                                                                         |
| Other NFκB Signaling                         | AKT1, MAP3K1 (MEKK1), RAF1, BCL10, CARD11, CASP1 (ICE), CASP8 (FLICE), CFLAR (Casper), HMOX1, MALT1, PSIP1, RHOA, TIMP1                                                                                                    |



**Table S4. Detailed description of genes associated with NFκB signaling pathway (PAHS-025Z, Qiagen)**

| <b>Gene Symbol</b> | <b>Descriptions</b>                                                               | <b>UniGene</b> | <b>GenBank</b> |
|--------------------|-----------------------------------------------------------------------------------|----------------|----------------|
| AGT                | Angiotensinogen (serpin peptidase inhibitor, clade A, member 8)                   | Hs.19383       | NM_000029      |
| AKT1               | V-akt murine thymoma viral oncogene homolog 1                                     | Hs.525622      | NM_005163      |
| ATF1               | Activating transcription factor 1                                                 | Hs.648565      | NM_005171      |
| BCL10              | B-cell CLL/lymphoma 10                                                            | Hs.193516      | NM_003921      |
| BCL2A1             | BCL2-related protein A1                                                           | Hs.227817      | NM_004049      |
| BCL2L1             | BCL2-like 1                                                                       | Hs.516966      | NM_138578      |
| BCL3               | B-cell CLL/lymphoma 3                                                             | Hs.31210       | NM_005178      |
| BIRC2              | Baculoviral IAP repeat containing 2                                               | Hs.696238      | NM_001166      |
| BIRC3              | Baculoviral IAP repeat containing 3                                               | Hs.127799      | NM_001165      |
| CARD11             | Caspase recruitment domain family, member 11                                      | Hs.648101      | NM_032415      |
| CASP1              | Caspase 1, apoptosis-related cysteine peptidase (interleukin 1, beta, convertase) | Hs.2490        | NM_033292      |
| CASP8              | Caspase 8, apoptosis-related cysteine peptidase                                   | Hs.599762      | NM_001228      |
| CCL2               | Chemokine (C-C motif) ligand 2                                                    | Hs.303649      | NM_002982      |
| CCL5               | Chemokine (C-C motif) ligand 5                                                    | Hs.514821      | NM_002985      |
| CD27               | CD27 molecule                                                                     | Hs.355307      | NM_001242      |
| CD40               | CD40 molecule, TNF receptor superfamily member 5                                  | Hs.472860      | NM_001250      |
| CFLAR              | CASP8 and FADD-like apoptosis regulator                                           | Hs.390736      | NM_003879      |
| CHUK               | Conserved helix-loop-helix ubiquitous kinase                                      | Hs.198998      | NM_001278      |
| CSF1               | Colony stimulating factor 1 (macrophage)                                          | Hs.591402      | NM_000757      |
| CSF2               | Colony stimulating factor 2 (granulocyte-macrophage)                              | Hs.1349        | NM_000758      |
| CSF3               | Colony stimulating factor 3 (granulocyte)                                         | Hs.2233        | NM_000759      |
| EGFR               | Epidermal growth factor receptor                                                  | Hs.488293      | NM_005228      |
| EGR1               | Early growth response 1                                                           | Hs.326035      | NM_001964      |
| ELK1               | ELK1, member of ETS oncogene family                                               | Hs.181128      | NM_005229      |
| F2R                | Coagulation factor II (thrombin) receptor                                         | Hs.482562      | NM_001992      |
| FADD               | Fas (TNFRSF6)-associated via death domain                                         | Hs.86131       | NM_003824      |
| FASLG              | Fas ligand (TNF superfamily, member 6)                                            | Hs.2007        | NM_000639      |
| FOS                | FBJ murine osteosarcoma viral oncogene homolog                                    | Hs.728789      | NM_005252      |
| HMOX1              | Heme oxygenase (decycling) 1                                                      | Hs.517581      | NM_002133      |

|        |                                                                                       |           |           |
|--------|---------------------------------------------------------------------------------------|-----------|-----------|
| ICAM1  | Intercellular adhesion molecule 1                                                     | Hs.643447 | NM_000201 |
| IFNA1  | Interferon, alpha 1                                                                   | Hs.37026  | NM_024013 |
| IFNG   | Interferon, gamma                                                                     | Hs.856    | NM_000619 |
| IKBKB  | Inhibitor of kappa light polypeptide gene enhancer in B-cells, kinase beta            | Hs.597664 | NM_001556 |
| IKBKE  | Inhibitor of kappa light polypeptide gene enhancer in B-cells, kinase epsilon         | Hs.321045 | NM_014002 |
| IKBKG  | Inhibitor of kappa light polypeptide gene enhancer in B-cells, kinase gamma           | Hs.43505  | NM_003639 |
| IL10   | Interleukin 10                                                                        | Hs.193717 | NM_000572 |
| IL1A   | Interleukin 1, alpha                                                                  | Hs.1722   | NM_000575 |
| IL1B   | Interleukin 1, beta                                                                   | Hs.126256 | NM_000576 |
| IL1R1  | Interleukin 1 receptor, type I                                                        | Hs.701982 | NM_000877 |
| CXCL8  | Interleukin 8                                                                         | Hs.624    | NM_000584 |
| IRAK1  | Interleukin-1 receptor-associated kinase 1                                            | Hs.522819 | NM_001569 |
| IRAK2  | Interleukin-1 receptor-associated kinase 2                                            | Hs.449207 | NM_001570 |
| IRF1   | Interferon regulatory factor 1                                                        | Hs.436061 | NM_002198 |
| JUN    | Jun proto-oncogene                                                                    | Hs.714791 | NM_002228 |
| LTA    | Lymphotoxin alpha (TNF superfamily, member 1)                                         | Hs.36     | NM_000595 |
| LTBR   | Lymphotoxin beta receptor (TNFR superfamily, member 3)                                | Hs.1116   | NM_002342 |
| MALT1  | Mucosa associated lymphoid tissue lymphoma translocation gene 1                       | Hs.601217 | NM_173844 |
| MAP3K1 | Mitogen-activated protein kinase kinase kinase 1                                      | Hs.657756 | NM_005921 |
| MYD88  | Myeloid differentiation primary response gene (88)                                    | Hs.82116  | NM_002468 |
| NFKB1  | Nuclear factor of kappa light polypeptide gene enhancer in B-cells 1                  | Hs.654408 | NM_003998 |
| NFKB2  | Nuclear factor of kappa light polypeptide gene enhancer in B-cells 2 (p49/p100)       | Hs.73090  | NM_002502 |
| NFKBIA | Nuclear factor of kappa light polypeptide gene enhancer in B-cells inhibitor, alpha   | Hs.81328  | NM_020529 |
| NFKBIB | Nuclear factor of kappa light polypeptide gene enhancer in B-cells inhibitor, beta    | Hs.9731   | NM_002503 |
| NFKBIE | Nuclear factor of kappa light polypeptide gene enhancer in B-cells inhibitor, epsilon | Hs.458276 | NM_004556 |
| NOD1   | Nucleotide-binding oligomerization domain containing 1                                | Hs.405153 | NM_006092 |
| PSIP1  | PC4 and SFRS1 interacting protein 1                                                   | Hs.658434 | NM_021144 |
| RAF1   | V-raf-1 murine leukemia viral oncogene homolog 1                                      | Hs.159130 | NM_002880 |
| REL    | V-rel reticuloendotheliosis viral oncogene homolog (avian)                            | Hs.631886 | NM_002908 |
| RELA   | V-rel reticuloendotheliosis viral oncogene homolog A (avian)                          | Hs.502875 | NM_021975 |
| RELB   | V-rel reticuloendotheliosis viral oncogene homolog B                                  | Hs.654402 | NM_006509 |
| RHOA   | Ras homolog gene family, member A                                                     | Hs.247077 | NM_001664 |
| RIPK1  | Receptor (TNFRSF)-interacting serine-threonine kinase 1                               | Hs.519842 | NM_003804 |

|           |                                                           |           |           |
|-----------|-----------------------------------------------------------|-----------|-----------|
| STAT1     | Signal transducer and activator of transcription 1, 91kDa | Hs.642990 | NM_007315 |
| TBK1      | TANK-binding kinase 1                                     | Hs.505874 | NM_013254 |
| TICAM1    | Toll-like receptor adaptor molecule 1                     | Hs.29344  | NM_182919 |
| TICAM2    | Toll-like receptor adaptor molecule 2                     | Hs.710895 | NM_021649 |
| TIMP1     | TIMP metalloproteinase inhibitor 1                        | Hs.522632 | NM_003254 |
| TLR1      | Toll-like receptor 1                                      | Hs.654532 | NM_003263 |
| TLR2      | Toll-like receptor 2                                      | Hs.519033 | NM_003264 |
| TLR3      | Toll-like receptor 3                                      | Hs.657724 | NM_003265 |
| TLR4      | Toll-like receptor 4                                      | Hs.174312 | NM_138554 |
| TLR6      | Toll-like receptor 6                                      | Hs.662185 | NM_006068 |
| TLR9      | Toll-like receptor 9                                      | Hs.87968  | NM_017442 |
| TNF       | Tumor necrosis factor                                     | Hs.241570 | NM_000594 |
| TNFAIP3   | Tumor necrosis factor, alpha-induced protein 3            | Hs.211600 | NM_006290 |
| TNFRSF10A | Tumor necrosis factor receptor super family, member 10a   | Hs.591834 | NM_003844 |
| TNFRSF10B | Tumor necrosis factor receptor super family, member 10b   | Hs.521456 | NM_003842 |
| TNFRSF1A  | Tumor necrosis factor receptor superfamily, member 1A     | Hs.279594 | NM_001065 |
| TNFSF10   | Tumor necrosis factor (ligand) superfamily, member 10     | Hs.478275 | NM_003810 |
| TNFSF14   | Tumor necrosis factor (ligand) superfamily, member 14     | Hs.129708 | NM_003807 |
| TRADD     | TNFRSF1A-associated via death domain                      | Hs.460996 | NM_003789 |
| TRAF2     | TNF receptor-associated factor 2                          | Hs.522506 | NM_021138 |
| TRAF3     | TNF receptor-associated factor 3                          | Hs.510528 | NM_003300 |
| TRAF6     | TNF receptor-associated factor 6                          | Hs.591983 | NM_004620 |
| ACTB      | Actin, beta                                               | Hs.520640 | NM_001101 |
| B2M       | Beta-2-microglobulin                                      | Hs.534255 | NM_004048 |
| GAPDH     | Glyceraldehyde-3-phosphate dehydrogenase                  | Hs.592355 | NM_002046 |
| HPRT1     | Hypoxanthine phosphoribosyltransferase 1                  | Hs.412707 | NM_000194 |
| RPLP0     | Ribosomal protein, large, P0                              | Hs.546285 | NM_001002 |

**Table S5: List of primary and secondary antibodies used in Bioplex Multiplex cytokine/chemokine(s) bead assay**

| <b>Primary antibody</b>                  |                                                  |                 |                         |
|------------------------------------------|--------------------------------------------------|-----------------|-------------------------|
| <b>SL</b>                                | <b>Name</b>                                      | <b>Catalog#</b> | <b>Vendor</b>           |
| 1                                        | Human CXCL8/IL-8 MAb                             | M801            | ThermoFisher Scientific |
| 2                                        | Human CCL5/RANTES PAb                            | P230E           | ThermoFisher Scientific |
| 3                                        | Rat Anti-Human GM-CSF-UNLB                       | 10111-01        | SouthernBiotech         |
| 4                                        | Human IFN $\gamma$ MAb                           | M700A           | ThermoFisher Scientific |
| 5                                        | Human IL-1beta/ IL-1F2 Antibody                  | MAB601-500      | R&D System              |
| 6                                        | Human IL-6 MAb                                   | M620            | ThermoFisher Scientific |
| 7                                        | Rat Anti-Human IL-10-UNLB                        | 10100-01        | SouthernBiotech         |
| 8                                        | Human/Primate IL-17/IL-17A Antibody              | MAB317-500      | R&D System              |
| 9                                        | Human IP-10/ CXCL10/CRG-2 Antibody               | MAB266-500      | R&D System              |
| 10                                       | Human MCP-1/CCL2/JE Antibody                     | MAB679-500      | R&D System              |
| 11                                       | Human MIP-1 $\alpha$ /CCL3Antibody               | AF-270-NA       | R&D System              |
| 12                                       | Human MIP-1 $\beta$ /CCL4 Antibody               | MAB271-100      | R&D System              |
| 13                                       | Human TNF $\alpha$ MAb                           | M303            | ThermoFisher Scientific |
| <b>Secondary antibody (Biotinylated)</b> |                                                  |                 |                         |
| <b>SL</b>                                | <b>Name</b>                                      | <b>Catalog#</b> | <b>Vendor</b>           |
| 1                                        | Human CXCL8/IL-8 MAb, Biotin-labeled             | M802B           | ThermoFisher Scientific |
| 2                                        | Human CCL5/RANTES MAb, Biotin-labeled            | M230B           | ThermoFisher Scientific |
| 3                                        | Rat Anti-Human GM-CSF-BIOT                       | 10112-08        | SouthernBiotech         |
| 4                                        | Human IFN $\gamma$ MAb, Biotin-labeled           | M701B           | ThermoFisher Scientific |
| 5                                        | Human IL-1beta/IL-1F2 Biotinylated Antibody      | BAF201          | R&D System              |
| 6                                        | Human IL-6 MAb, Biotin-labeled                   | M621B           | ThermoFisher Scientific |
| 7                                        | Rat Anti-Human IL-10-BIOT                        | 10110-08        | SouthernBiotech         |
| 8                                        | Human/Primate IL-17/IL-17A Biotinylated Antibody | BAF317          | R&D System              |
| 9                                        | Human IP-10/CXCL10/CRG-2 Biotinylated Antibody   | BAF266          | R&D System              |
| 10                                       | Human MCP-1/CCL2/JE Biotinylated Antibody        | BAF279          | R&D System              |
| 11                                       | Human MIP-1 $\alpha$ /CCL3 Biotinylated Antibody | BAF270          | R&D System              |
| 12                                       | Human MIP-1 $\beta$ /CCL4 Biotinylated Antibody  | BAF271          | R&D System              |
| 13                                       | Human TNF $\alpha$ MAb, Biotin-labeled           | M302B           | ThermoFisher Scientific |



**Table S6. Functions of gene associated with innate immunity and inflammatory responses**

| <b>Gene name</b>     | <b>Function(s)</b>                                                                                                                                                                                                             |
|----------------------|--------------------------------------------------------------------------------------------------------------------------------------------------------------------------------------------------------------------------------|
| BCL10                | Positive regulator to activate NF $\kappa$ B (Ruland et al., 2001, Sun and Yang, 2010)                                                                                                                                         |
| CARD11               | When expressed in cells, this protein activated NF $\kappa$ B (Bertin et al., 2001)                                                                                                                                            |
| CCL2 (MCP-1)         | Involved in immunoregulatory and inflammatory processes (Donadelli et al., 2000, Mezzano et al., 2004)                                                                                                                         |
| CCL5 (RANTES)        | Activator of NF $\kappa$ B (Huang et al., 2009)                                                                                                                                                                                |
| CHUK/IKK $\alpha$    | Activator of transcription factor (Adli et al., 2010, Israel, 2010, Hacker and Karin, 2006)                                                                                                                                    |
| CSF1 (M-CSF)         | Controls the production, differentiation and function of monocytes and macrophages (Stanley et al., 1997)                                                                                                                      |
| CSF2 (GM-CSF)        | Activates monocytes/macrophages, and acts as an important hematopoietic growth factor and immune modulator (Ushach and Zlotnik, 2016, Shi et al., 2006)                                                                        |
| CSF3 (G-CSF)         | Controls the production, differentiation and function of granulocytes (Mehta et al., 2015, Xu et al., 2000)                                                                                                                    |
| CXCL8 (IL-8)         | Major mediators associated with inflammation, plays key role in neutrophil recruitment and neutrophil degranulation (Harada et al., 1994)                                                                                      |
| IL1A                 | Pleiotropic cytokine involved in various immune responses and inflammatory processes (Di Paolo and Shayakhmetov, 2016, Borthwick, 2016)                                                                                        |
| IL1B                 | Important mediator of the inflammatory response (Di Paolo and Shayakhmetov, 2016, Borthwick, 2016)                                                                                                                             |
| IL1R1                | Important mediator involved in many cytokine-induced immune and inflammatory responses (Gasse et al., 2007, Parpaleix et al., 2016)                                                                                            |
| IKBKB (IKK $\beta$ ) | Phosphorylates the inhibitor in the inhibitor/NF $\kappa$ B complex, causing dissociation of the inhibitor and activation of NF $\kappa$ B (Adli et al., 2010, Israel, 2010, Hacker and Karin, 2006, De Molfetta et al., 2010) |
| IRAK1                | Partially responsible for IL1-induced upregulation of the transcription factor NF $\kappa$ B (Liu et al., 2008)                                                                                                                |
| IRAK2                | Participates in the IL1-induced upregulation of the transcription factor NF $\kappa$ B (Keating et al., 2007, Muzio et al., 1997)                                                                                              |
| MALT1                | Activate NF $\kappa$ B (Kingeter and Schaefer, 2010, Sun and Yang, 2010)                                                                                                                                                       |
| MYD88                | Plays a central role in the innate and adaptive immune response, functions as essential signal transducer in the IL-1 and TLR signaling pathways (Gasse et al., 2007, Parpaleix et al., 2016, Muzio et al., 1997)              |
| NFKB1 (p105/p50)     | Activated NF $\kappa$ B1 translocates in to the nucleus and stimulates the expression of genes involved in a wide variety of biological functions (Yu et al., 2009, Lawrence, 2009)                                            |
| NFKB2 (p100/p52)     | Involves in non-canonical activation of NF $\kappa$ B pathway (Sun, 2012, Sun, 2011, Lawrence, 2009)                                                                                                                           |

|                                 |                                                                                                                                                                                                                                                                                                                   |
|---------------------------------|-------------------------------------------------------------------------------------------------------------------------------------------------------------------------------------------------------------------------------------------------------------------------------------------------------------------|
| NFKBIA/IkB $\alpha$             | Inhibits NF $\kappa$ B/REL complexes, which are involved in inflammatory responses (Verma et al., 1995, Jacobs and Harrison, 1998)                                                                                                                                                                                |
| NFKBIB/IkB $\beta$              | Inhibits NF $\kappa$ B by complexing with and trapping it in the cytoplasm (Woronicz et al., 1997)                                                                                                                                                                                                                |
| RAF1                            | Activates NF $\kappa$ B transcription factor (Yeung et al., 2001, Li and Sedivy, 1993)                                                                                                                                                                                                                            |
| REL                             | Involves in NF $\kappa$ B activation, immune response and inflammation (Oeckinghaus and Ghosh, 2009)                                                                                                                                                                                                              |
| TBK1                            | Mediates NF $\kappa$ B activation (Pomerantz and Baltimore, 1999, Moser et al., 2015)                                                                                                                                                                                                                             |
| TICAM1 (TRIF)                   | Involves in native immunity against invading pathogens (Funami et al., 2008)                                                                                                                                                                                                                                      |
| TLR1, TLR2, TLR3, TLR4 and TLR6 | Plays a fundamental role in pathogen recognition and activation of innate immunity, Activation of TLRs leads to the up-regulation of signaling pathways to modulate the host's inflammatory response (Alexopoulou et al., 2001, Yu and Levine, 2011, Barton and Kagan, 2009, O'Neill et al., 2013, O'Neill, 2006) |
| TNF                             | Regulate wide spectrum of biological process including cell proliferation, differentiation and apoptosis (Schutze et al., 1995, Zhou et al., 2003, Gupta et al., 2005)                                                                                                                                            |
| TRAF2                           | Mediates the signal transduction from members of the TNF receptor superfamily. Required for TNF-alpha-mediated activation of NF $\kappa$ B (Pomerantz and Baltimore, 1999, Zhang et al., 2011, Etemadi et al., 2015, Baud et al., 1999)                                                                           |
| TRAF3                           | Participates in the signal transduction of CD40 and important for the activation of the immune response (Ni et al., 2000)                                                                                                                                                                                         |
| TRAF6                           | Functions as a signal transducer in the NF $\kappa$ B pathway (Sun and Yang, 2010, Baud et al., 1999, Walsh et al., 2008)                                                                                                                                                                                         |

## Supplementary References

- ADLI, M., MERKHOFFER, E., COGSWELL, P. & BALDWIN, A. S. (2010). IKKalpha and IKKbeta each function to regulate NF-kappaB activation in the TNF-induced/canonical pathway. *PLoS One* 5(2), e9428.
- ALEXOPOULOU, L., HOLT, A. C., MEDZHITOV, R. & FLAVELL, R. A. (2001). Recognition of double-stranded RNA and activation of NF-kappaB by Toll-like receptor 3. *Nature* 413(6857), 732-8.
- BARTON, G. M. & KAGAN, J. C. (2009). A cell biological view of Toll-like receptor function: regulation through compartmentalization. *Nat Rev Immunol* 9(8), 535-42.
- BAUD, V., LIU, Z. G., BENNETT, B., SUZUKI, N., XIA, Y. & KARIN, M. (1999). Signaling by proinflammatory cytokines: oligomerization of TRAF2 and TRAF6 is sufficient for JNK and IKK activation and target gene induction via an amino-terminal effector domain. *Genes Dev* 13(10), 1297-308.
- BERTIN, J., WANG, L., GUO, Y., JACOBSON, M. D., POYET, J. L., SRINIVASULA, S. M., et al. (2001). CARD11 and CARD14 are novel caspase recruitment domain (CARD)/membrane-associated guanylate kinase (MAGUK) family members that interact with BCL10 and activate NF-kappa B. *J Biol Chem* 276(15), 11877-82.
- BORTHWICK, L. A. (2016). The IL-1 cytokine family and its role in inflammation and fibrosis in the lung. *Semin Immunopathol* 38(4), 517-34.
- DE MOLFETTA, G. A., LUCIOLA ZANETTE, D., ALEXANDRE PANEPUCCI, R., DOS SANTOS, A. R., DA SILVA, W. A., JR. & ANTONIO ZAGO, M. (2010). Role of NFKB2 on the early myeloid differentiation of CD34+ hematopoietic stem/progenitor cells. *Differentiation* 80(4-5), 195-203.
- DI PAOLO, N. C. & SHAYAKHMETOV, D. M. (2016). Interleukin 1alpha and the inflammatory process. *Nat Immunol* 17(8), 906-13.
- DONADELLI, R., ABBATE, M., ZANCHI, C., CORNA, D., TOMASONI, S., BENIGNI, A., et al. (2000). Protein traffic activates NF-kB gene signaling and promotes MCP-1-dependent interstitial inflammation. *Am J Kidney Dis* 36(6), 1226-41.
- ETEMADI, N., CHOPIN, M., ANDERTON, H., TANZER, M. C., RICKARD, J. A., ABEYSEKERA, W., et al. (2015). TRAF2 regulates TNF and NF-kappaB signalling to suppress apoptosis and skin inflammation independently of Sphingosine kinase 1. *Elife* 4.
- FUNAMI, K., SASAI, M., OSHIUMI, H., SEYA, T. & MATSUMOTO, M. (2008). Homo-oligomerization is essential for Toll/interleukin-1 receptor domain-containing adaptor molecule-1-mediated NF-kappaB and interferon regulatory factor-3 activation. *J Biol Chem* 283(26), 18283-91.
- GASSE, P., MARY, C., GUENON, I., NOULIN, N., CHARRON, S., SCHNYDER-CANDRIAN, S., et al. (2007). IL-1R1/MyD88 signaling and the inflammasome are essential in pulmonary inflammation and fibrosis in mice. *J Clin Invest* 117(12), 3786-99.
- GUPTA, S., BI, R., KIM, C., CHIPLUNKAR, S., YEL, L. & GOLLAPUDI, S. (2005). Role of NF-kappaB signaling pathway in increased tumor necrosis factor-alpha-induced apoptosis of lymphocytes in aged humans. *Cell Death Differ* 12(2), 177-83.
- HACKER, H. & KARIN, M. (2006). Regulation and function of IKK and IKK-related kinases. *Sci STKE* 2006(357), re13.
- HARADA, A., SEKIDO, N., AKAHOSHI, T., WADA, T., MUKAIDA, N. & MATSUSHIMA, K. (1994). Essential involvement of interleukin-8 (IL-8) in acute inflammation. *J Leukoc Biol* 56(5), 559-64.
- HUANG, C. Y., FONG, Y. C., LEE, C. Y., CHEN, M. Y., TSAI, H. C., HSU, H. C., et al. (2009). CCL5 increases lung cancer migration via PI3K, Akt and NF-kappaB pathways. *Biochem Pharmacol* 77(5), 794-803.
- ISRAEL, A. (2010). The IKK complex, a central regulator of NF-kappaB activation. *Cold Spring Harb Perspect Biol* 2(3), a000158.
- JACOBS, M. D. & HARRISON, S. C. (1998). Structure of an IkappaBalpha/NF-kappaB complex. *Cell* 95(6), 749-58.



- KEATING, S. E., MALONEY, G. M., MORAN, E. M. & BOWIE, A. G. (2007). IRAK-2 participates in multiple toll-like receptor signaling pathways to NF-kappaB via activation of TRAF6 ubiquitination. *J Biol Chem* 282(46), 33435-43.
- KINGETER, L. M. & SCHAEFER, B. C. (2010). Malt1 and cIAP2-Malt1 as effectors of NF-kappaB activation: kissing cousins or distant relatives? *Cell Signal* 22(1), 9-22.
- LAWRENCE, T. (2009). The nuclear factor NF-kappaB pathway in inflammation. *Cold Spring Harb Perspect Biol* 1(6), a001651.
- LI, S. & SEDIVY, J. M. (1993). Raf-1 protein kinase activates the NF-kappa B transcription factor by dissociating the cytoplasmic NF-kappa B-I kappa B complex. *Proc Natl Acad Sci U S A* 90(20), 9247-51.
- LIU, G., PARK, Y. J. & ABRAHAM, E. (2008). Interleukin-1 receptor-associated kinase (IRAK) -1-mediated NF-kappaB activation requires cytosolic and nuclear activity. *FASEB J* 22(7), 2285-96.
- MEHTA, H. M., MALANDRA, M. & COREY, S. J. (2015). G-CSF and GM-CSF in Neutropenia. *J Immunol* 195(4), 1341-9.
- MEZZANO, S., AROS, C., DROGUETT, A., BURGOS, M. E., ARDILES, L., FLORES, C., et al. (2004). NF-kappaB activation and overexpression of regulated genes in human diabetic nephropathy. *Nephrol Dial Transplant* 19(10), 2505-12.
- MOSER, C. V., STEPHAN, H., ALTENRATH, K., KYNAST, K. L., RUSSE, O. Q., OLBRICH, K., et al. (2015). TANK-binding kinase 1 (TBK1) modulates inflammatory hyperalgesia by regulating MAP kinases and NF-kappaB dependent genes. *J Neuroinflammation* 12, 100.
- MUZIO, M., NI, J., FENG, P. & DIXIT, V. M. (1997). IRAK (Pelle) family member IRAK-2 and MyD88 as proximal mediators of IL-1 signaling. *Science* 278(5343), 1612-5.
- NI, C. Z., WELSH, K., LEO, E., CHIOU, C. K., WU, H., REED, J. C., et al. (2000). Molecular basis for CD40 signaling mediated by TRAF3. *Proc Natl Acad Sci U S A* 97(19), 10395-9.
- O'NEILL, L. A. (2006). How Toll-like receptors signal: what we know and what we don't know. *Curr Opin Immunol* 18(1), 3-9.
- O'NEILL, L. A., GOLENBOCK, D. & BOWIE, A. G. (2013). The history of Toll-like receptors - redefining innate immunity. *Nat Rev Immunol* 13(6), 453-60.
- OECKINGHAUS, A. & GHOSH, S. (2009). The NF-kappaB family of transcription factors and its regulation. *Cold Spring Harb Perspect Biol* 1(4), a000034.
- PARPALEIX, A., AMSELLEM, V., HOUSSAINI, A., ABID, S., BREAU, M., MARCOS, E., et al. (2016). Role of interleukin-1 receptor 1/MyD88 signalling in the development and progression of pulmonary hypertension. *Eur Respir J* 48(2), 470-83.
- POMERANTZ, J. L. & BALTIMORE, D. (1999). NF-kappaB activation by a signaling complex containing TRAF2, TANK and TBK1, a novel IKK-related kinase. *EMBO J* 18(23), 6694-704.
- RULAND, J., DUNCAN, G. S., ELIA, A., DEL BARCO BARRANTES, I., NGUYEN, L., PLYTE, S., et al. (2001). Bcl10 is a positive regulator of antigen receptor-induced activation of NF-kappaB and neural tube closure. *Cell* 104(1), 33-42.
- SCHUTZE, S., WIEGMANN, K., MACHLEIDT, T. & KRONKE, M. (1995). TNF-induced activation of NF-kappa B. *Immunobiology* 193(2-4), 193-203.
- SHI, Y., LIU, C. H., ROBERTS, A. I., DAS, J., XU, G., REN, G., et al. (2006). Granulocyte-macrophage colony-stimulating factor (GM-CSF) and T-cell responses: what we do and don't know. *Cell Res* 16(2), 126-33.
- STANLEY, E. R., BERG, K. L., EINSTEIN, D. B., LEE, P. S., PIXLEY, F. J., WANG, Y., et al. (1997). Biology and action of colony--stimulating factor-1. *Mol Reprod Dev* 46(1), 4-10.
- SUN, S. C. (2011). Non-canonical NF-kappaB signaling pathway. *Cell Res* 21(1), 71-85.
- SUN, S. C. (2012). The noncanonical NF-kappaB pathway. *Immunol Rev* 246(1), 125-40.

- SUN, W. & YANG, J. (2010). Molecular basis of lysophosphatidic acid-induced NF-kappaB activation. *Cell Signal* 22(12), 1799-803.
- USHACH, I. & ZLOTNIK, A. (2016). Biological role of granulocyte macrophage colony-stimulating factor (GM-CSF) and macrophage colony-stimulating factor (M-CSF) on cells of the myeloid lineage. *J Leukoc Biol* 100(3), 481-9.
- VERMA, I. M., STEVENSON, J. K., SCHWARZ, E. M., VAN ANTWERP, D. & MIYAMOTO, S. (1995). Rel/NF-kappa B/I kappa B family: intimate tales of association and dissociation. *Genes Dev* 9(22), 2723-35.
- WALSH, M. C., KIM, G. K., MAURIZIO, P. L., MOLNAR, E. E. & CHOI, Y. (2008). TRAF6 autoubiquitination-independent activation of the NFkappaB and MAPK pathways in response to IL-1 and RANKL. *PLoS One* 3(12), e4064.
- WORONICZ, J. D., GAO, X., CAO, Z., ROTHE, M. & GOEDDEL, D. V. (1997). IkappaB kinase-beta: NF-kappaB activation and complex formation with IkappaB kinase-alpha and NIK. *Science* 278(5339), 866-9.
- XU, S., HOGLUND, M., HAKANSSON, L. & VENGE, P. (2000). Granulocyte colony-stimulating factor (G-CSF) induces the production of cytokines in vivo. *Br J Haematol* 108(4), 848-53.
- YEUNG, K. C., ROSE, D. W., DHILLON, A. S., YAROS, D., GUSTAFSSON, M., CHATTERJEE, D., et al. (2001). Raf kinase inhibitor protein interacts with NF-kappaB-inducing kinase and TAK1 and inhibits NF-kappaB activation. *Mol Cell Biol* 21(21), 7207-17.
- YU, M. & LEVINE, S. J. (2011). Toll-like receptor, RIG-I-like receptors and the NLRP3 inflammasome: key modulators of innate immune responses to double-stranded RNA viruses. *Cytokine Growth Factor Rev* 22(2), 63-72.
- YU, Y., WAN, Y. & HUANG, C. (2009). The biological functions of NF-kappaB1 (p50) and its potential as an anti-cancer target. *Curr Cancer Drug Targets* 9(4), 566-71.
- ZHANG, L., BLACKWELL, K., ALTAEVA, A., SHI, Z. & HABELHAH, H. (2011). TRAF2 phosphorylation promotes NF-kappaB-dependent gene expression and inhibits oxidative stress-induced cell death. *Mol Biol Cell* 22(1), 128-40.
- ZHOU, A., SCOGGIN, S., GAYNOR, R. B. & WILLIAMS, N. S. (2003). Identification of NF-kappa B-regulated genes induced by TNFalpha utilizing expression profiling and RNA interference. *Oncogene* 22(13), 2054-64.
